# Supplementary material
Source: MDPI journal article supplement (https://www.mdpi.com/2227-9717/10/3/591)
Supplement: s1 [file s1 › processes-1623384-supplementary.pdf]

## Supplementary Materials

Figure S1 was used to point to Section 3.1.

Figure S2 was used to point to Section 3.1.

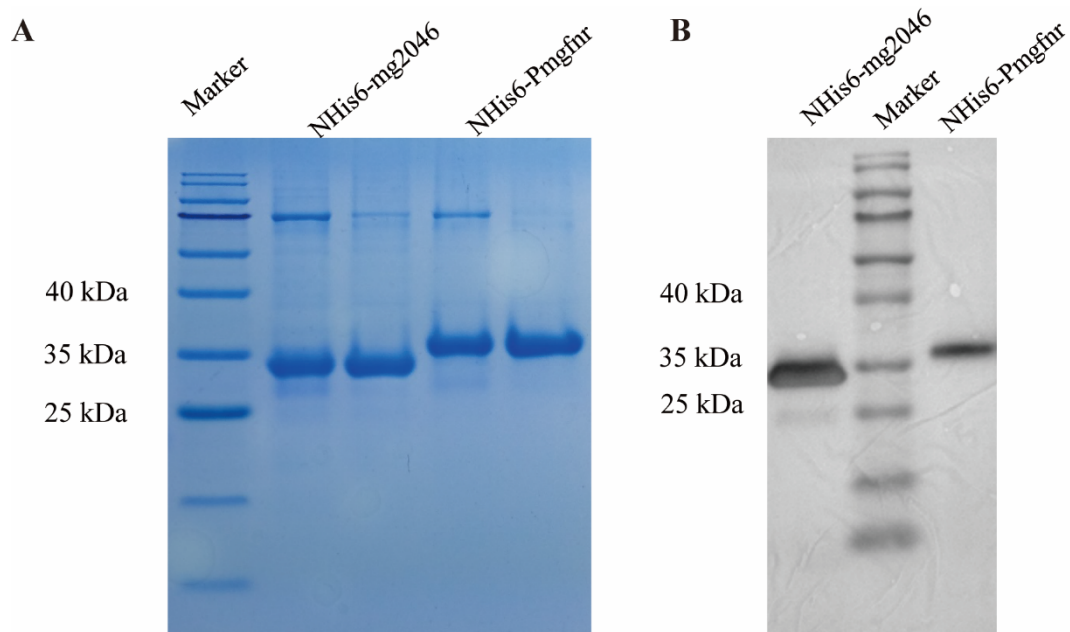

**Figure S1.** Protein purification and verification. (A)SDS-PAGE purification of proteins His6-Mgfmr and His6-Mg2046. (B)confirmation of target protein by Western blotting.

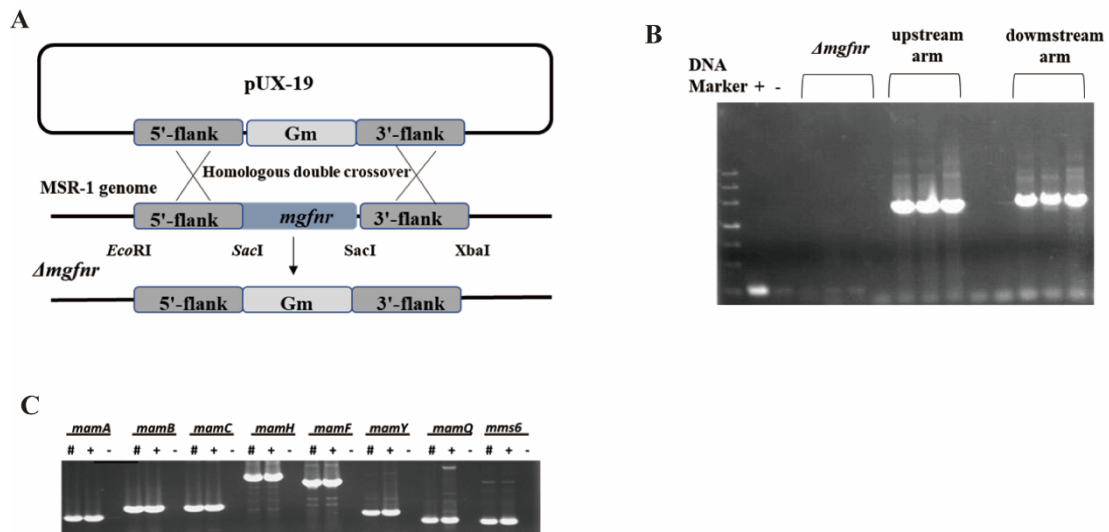

**Figure S2.** Construction of  $\Delta mgfmr$  strains and confirmation by PCR. (A) Construction of  $\Delta mgfmr$  strains (schematic). (B) Confirmation by PCR of  $\Delta mgfmr$  strains. Markers: 3000, 2000, 1200, 800, 500, and 200 bp. (C) Detection by PCR of *mam* genes in mutant strains.
